# Supplementary material for: Cell fiber-based three-dimensional culture system for highly efficient expansion of human induced pluripotent stem cells
Source: PubMed Central journal article supplement (PMC5460280; doi:10.1038/s41598-017-03246-2), 2017-06-06
Supplement: 41598_2017_3246_MOESM1_ESM.pdf [file 41598_2017_3246_MOESM1_ESM.pdf]

## **Supplementary information**

### **Title**

Cell fiber-based three-dimensional culture system for highly efficient expansion of human induced pluripotent stem cells

### **Authors**

Kazuhiro Ikeda<sup>1,3</sup>, Shogo Nagata<sup>1,2</sup>, Teru Okitsu<sup>1,2</sup>, Shoji Takeuchi<sup>1,2\*</sup>

<sup>1</sup>Institute of Industrial Science, The University of Tokyo, Tokyo, Japan

<sup>2</sup>ERATO Takeuchi Biohybrid Innovation Project, Japan Science and Technology Agency, Tokyo, Japan

<sup>3</sup>Graduate School of Life and Environmental Sciences, University of Tsukuba, Ibaraki, Japan

\* e-mail: takeuchi@iis.u-tokyo.ac.jp; Tel.: +81-3-5452-6650; Fax: +81-3-5452-6649

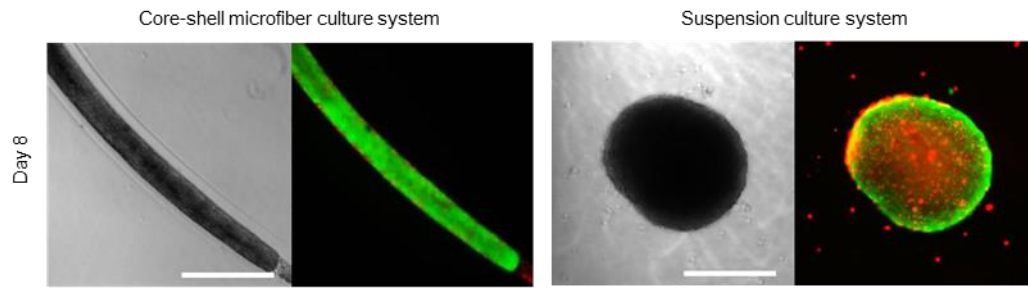

**Supplementary Figure S1.** Live/dead staining of human induced pluripotent stem (iPS) cells cultured in the core-shell microfiber culture system using a core-shell microfiber without additional extracellular matrix (ECM) components and conventional suspension culture system on day 8. Live cells were stained with calcein AM (green) and dead cells were stained with ethidium homodimer (red). Scale bar: 500  $\mu\text{m}$ .

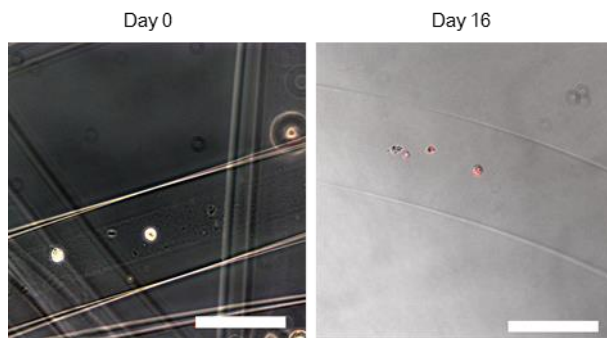

**Supplementary Figure S2.** Typical phase-contrast image (day 0) and merged phase-contrast and fluorescence image (day 16) of human iPS cells cultured in the microfibers at very low initial cell density ( $1.0 \times 10^6$  cells/mL). The cells on day 16 were stained by ethidium homodimer (red), indicating non-viable cells. Scale bar: 200  $\mu\text{m}$ .

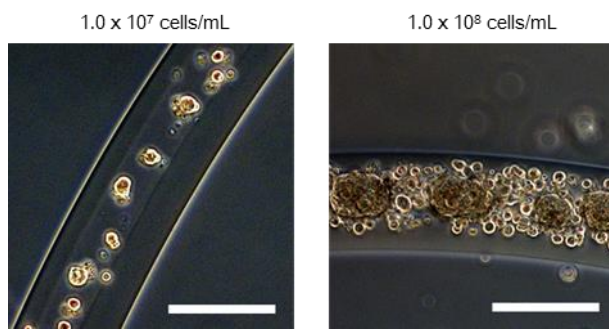

**Supplementary Figure S3.** Human iPS cells accompanied with collagen at low ( $1.0 \times 10^7$  cells/mL) and high ( $1.0 \times 10^8$  cells/mL) initial cell density on day 1. Scale bar: 250  $\mu\text{m}$ .

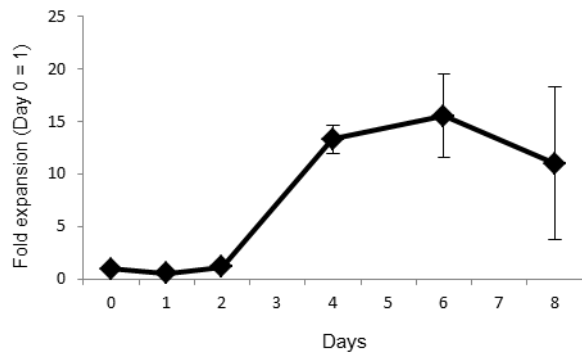

**Supplementary Figure S4.** Growth kinetics of human iPS cells in the core-shell microfiber culture system until day 8 ( $N \geq 3$ ).

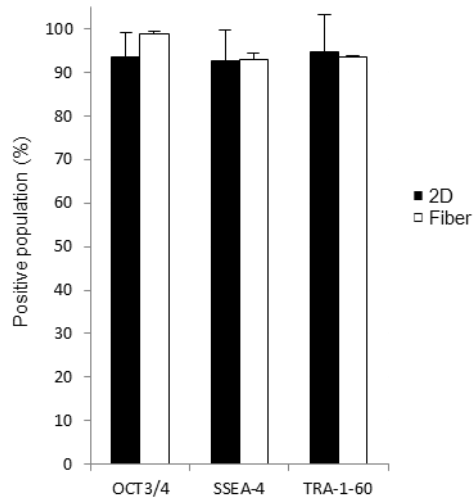

**Supplementary Figure S5.** Flow cytometry analysis of pluripotency-associated markers (OCT3/4, SSEA-4, and TRA-1-60). Cells cultured in the conventional 2D culture system (2D) or in the core-shell microfiber culture system (Fiber) for more than one month were analysed ( $N \geq 3$ ).

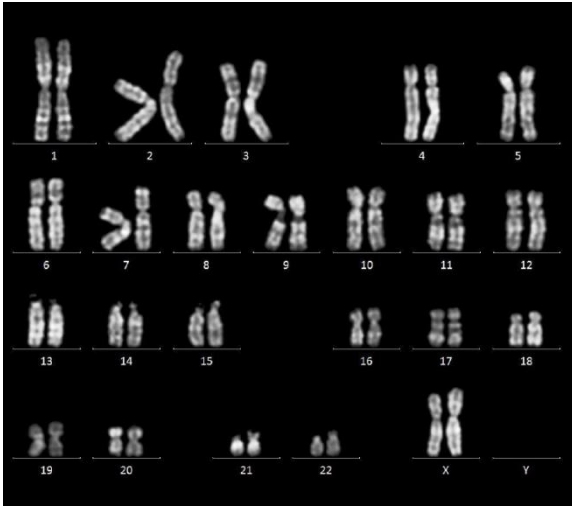

**Supplementary Figure S6.** Karyotyping of human iPS cells cultured for 56 days (14 passages) in the core-shell microfiber culture system by Q-band analysis (N = 20).

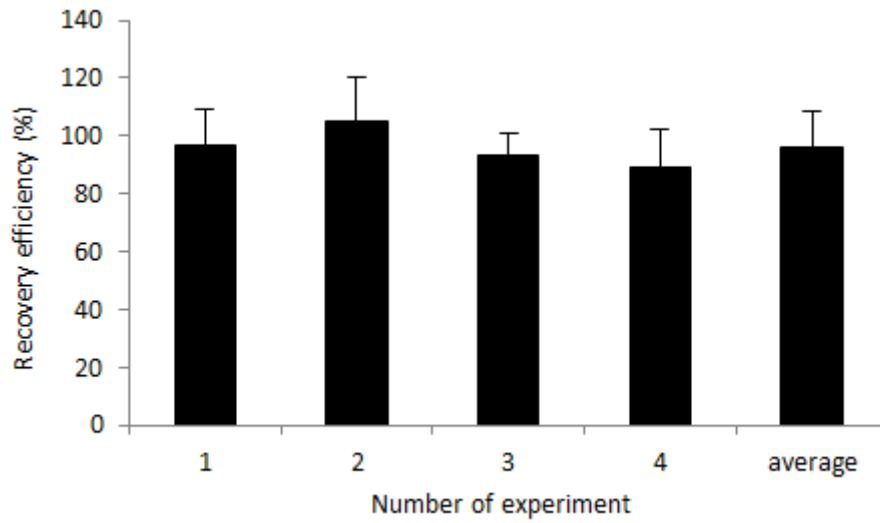

**Supplementary Figure S7.** Recovery efficiency of the encapsulated cells from the core-shell microfibers. To release the cells from the microfibers, the alginate shell was dissolved using alginate lyase (Sigma-Aldrich), as previously described<sup>16</sup>. The values were obtained from retrieved viable cell number immediately after the microfiber fabrication and estimated encapsulated cell number (N = 3).



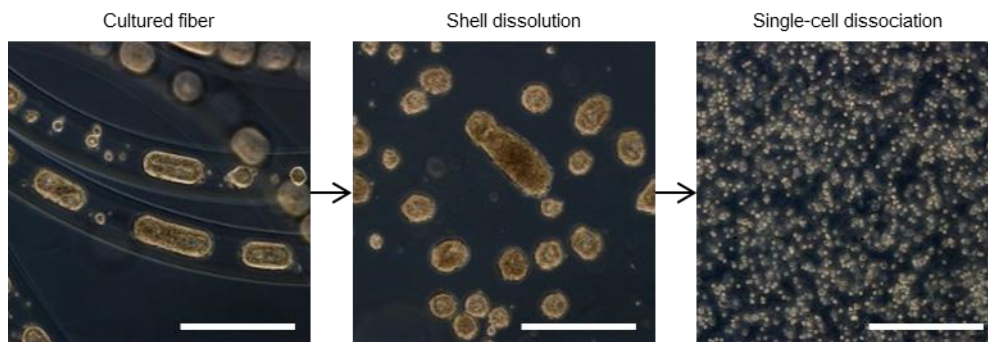

**Supplementary Figure S8.** Human iPS cells in the microfibers were retrieved by shell dissolution using alginate lyase and dissociated into single cells using the Accutase cell detachment solution. Scale bar: 500  $\mu\text{m}$ .

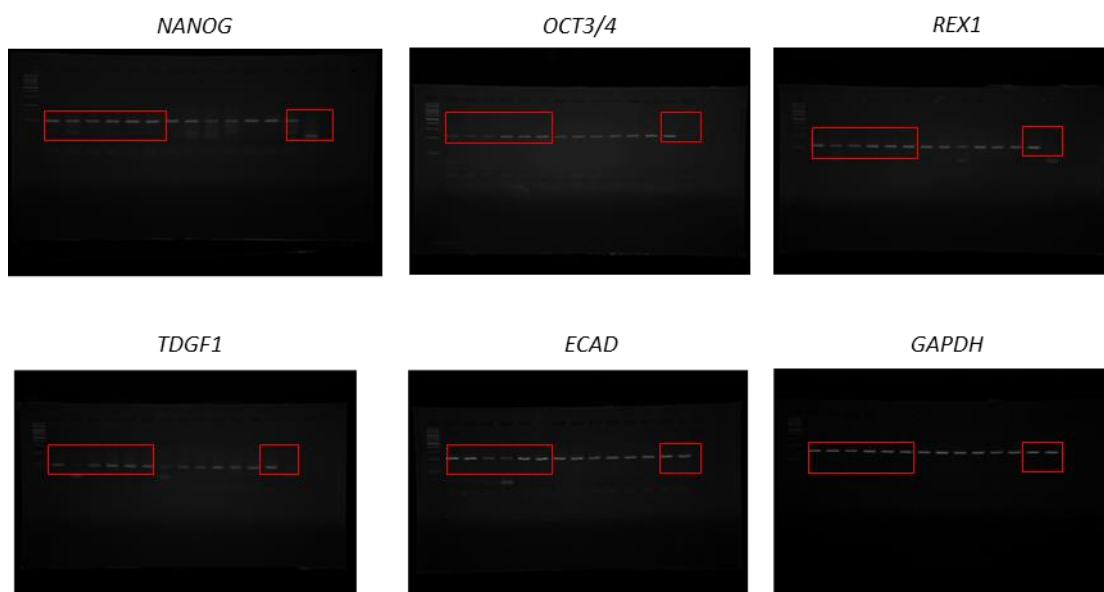

**Supplementary Figure S9.** Full images of gels in Fig. 4B.

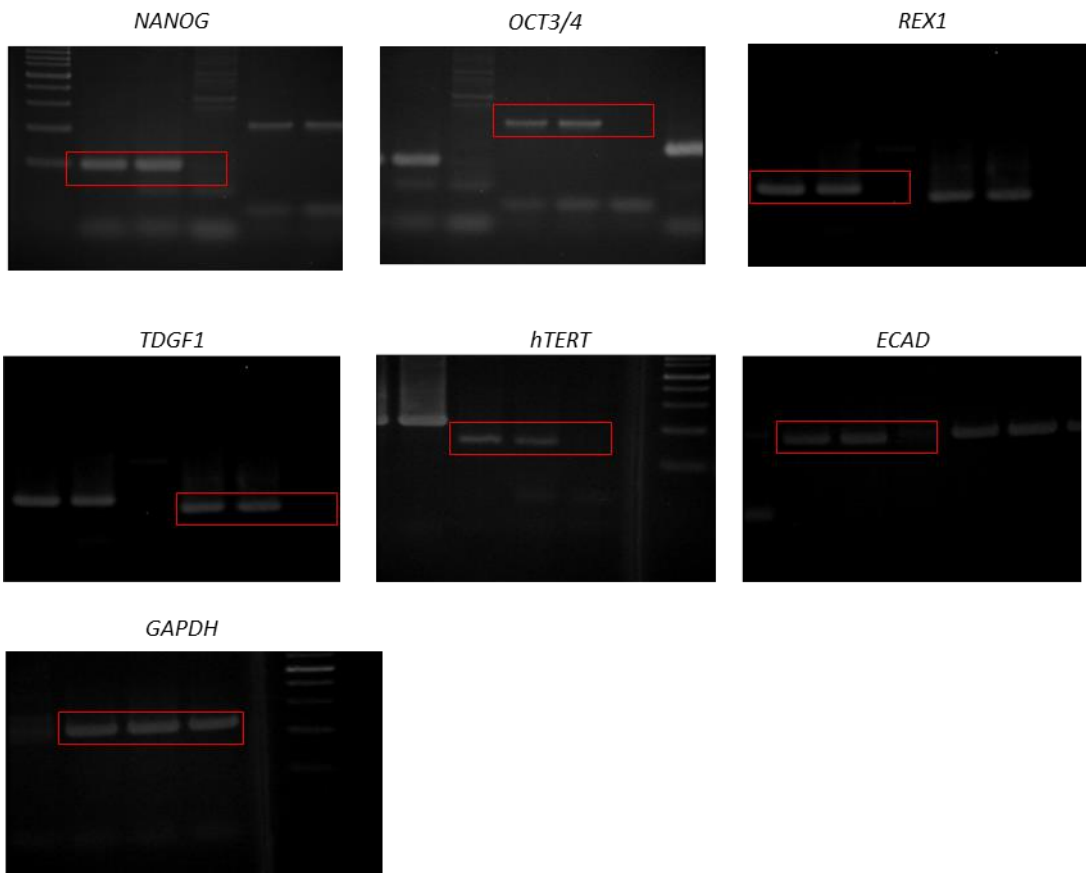

**Supplementary Figure S10.** Raw data of gels in Fig. 6A.

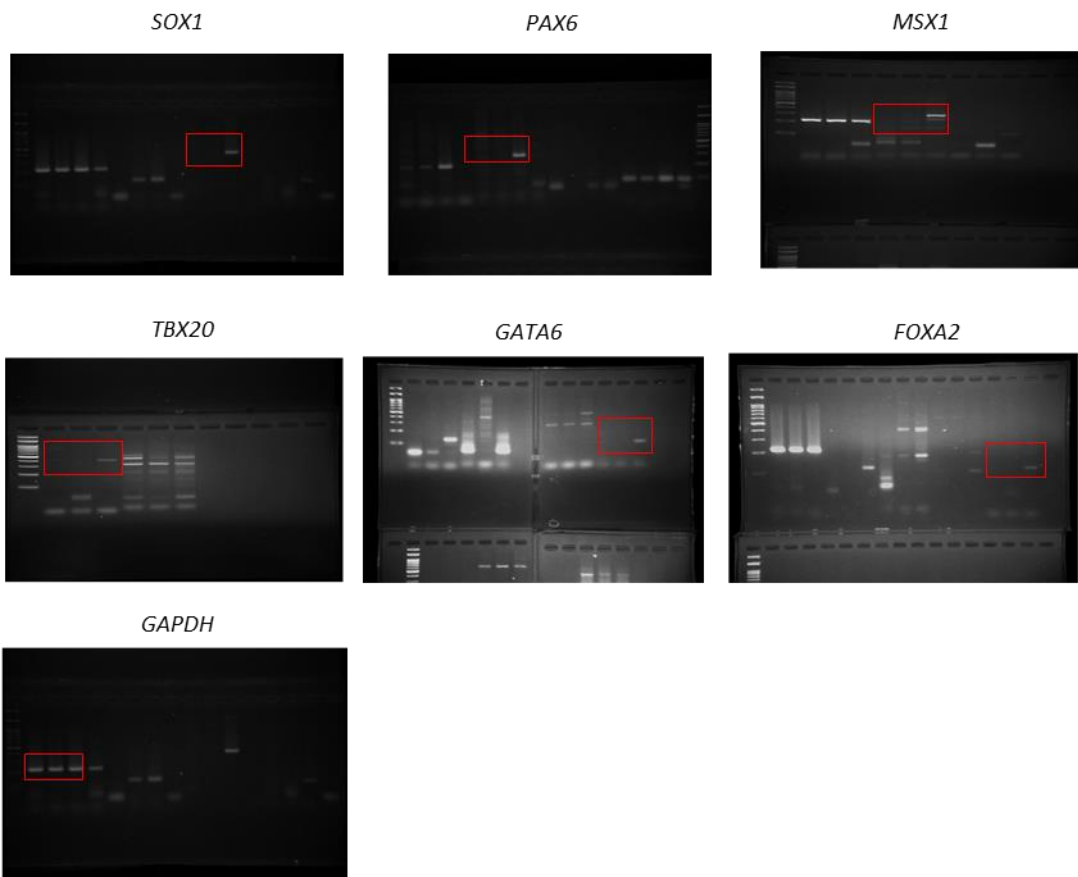

**Supplementary Figure S11.** Full images of gels in Fig. 6C.

| Genes         | Forward primer<br>5' - 3'    | Reverse primer<br>5' - 3'  | Annealing<br>(°C) | cycle |
|---------------|------------------------------|----------------------------|-------------------|-------|
| <i>NAVOG</i>  | CTGCTGAGATGCCTCACACG         | TGCCTTTGGGACTGGTGA         | 55                | 30    |
| <i>OCT3/4</i> | TCTCGCCCCCTCCAGGT            | GCCCCACTCCAACCTGG          | 55                | 30    |
| <i>REX1</i>   | AGAAACGGGCAAAGACAAGAC        | GCTGACAGTTCTATTTCCGC       | 55                | 30    |
| <i>TDGF1</i>  | ACAGCACAGTAAGGAGCTAAAC       | CGTCCGTAGAAGGAGGGAGG       | 55                | 30    |
| <i>ECAD</i>   | GAGCTTGTATTGAGCCTGGCA        | TGGGCAAATGTGTTTCAGCTCAGC   | 55                | 30    |
| <i>hTERT</i>  | TGTGCACCAACATCTACAAG         | GCGTTCTTGGCTTTCAGGAT       | 55                | 30    |
| <i>SOX1</i>   | GCGGAAAGCGTTTTCTTTG          | TAATCTGACTTCTCCTCCC        | 55                | 30    |
| <i>PAX6</i>   | ACCCATTATCCAGATGTGTTTGCCCGAG | ATGGTGAAGCTGGGCATAGGCGGCAG | 55                | 30    |
| <i>MSX1</i>   | CGAGAGGACCCCGTGGATGCAGAG     | GGCGGCCATCTTCAGCTTCTCCAG   | 60                | 35    |
| <i>TBX20</i>  | AGGTACCGCTACGCCTAC           | GTCAGTGAGCCTGGAGGA         | 60                | 35    |
| <i>GATA6</i>  | AGGGCTCGGTGAGTCCAAT          | CGCTGCTGGTGAATAAAAAGGA     | 55                | 30    |
| <i>FOXA2</i>  | TGGGAGCGGTGAAGATGGAAGGGCAC   | TCATGCCAGCGCCACGTACGACGAC  | 60                | 30    |
| <i>GAPDH</i>  | CTTCTTTTGCCTCGCCAGCCGAG      | CAGCCTTGACGGTGCCATGGAA     | 55                | 30    |

**Supplementary Table S1.** List of primers used for semi-quantitative reverse RT-PCR.
